# Supplementary material for: Long-Term Carbon Sequestration in Pine Forests under Different Silvicultural and Climatic Regimes in Spain
Source: MDPI journal article supplement (doi:10.3390/f13030450), 2022-03-12
Supplement: s1 [file s1]

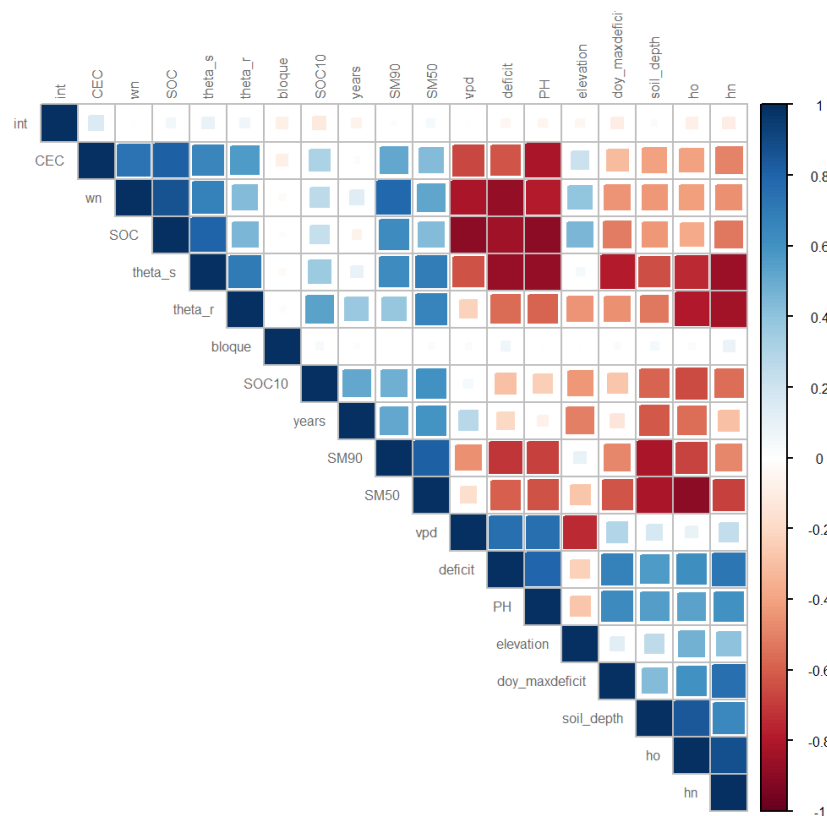

**Figure S1.** Correlation matrix computing the correlation coefficients between environmental and silvicultural variables with response indicators of interest. Features with high potential are identified by color legend. See variables description in Table S3.

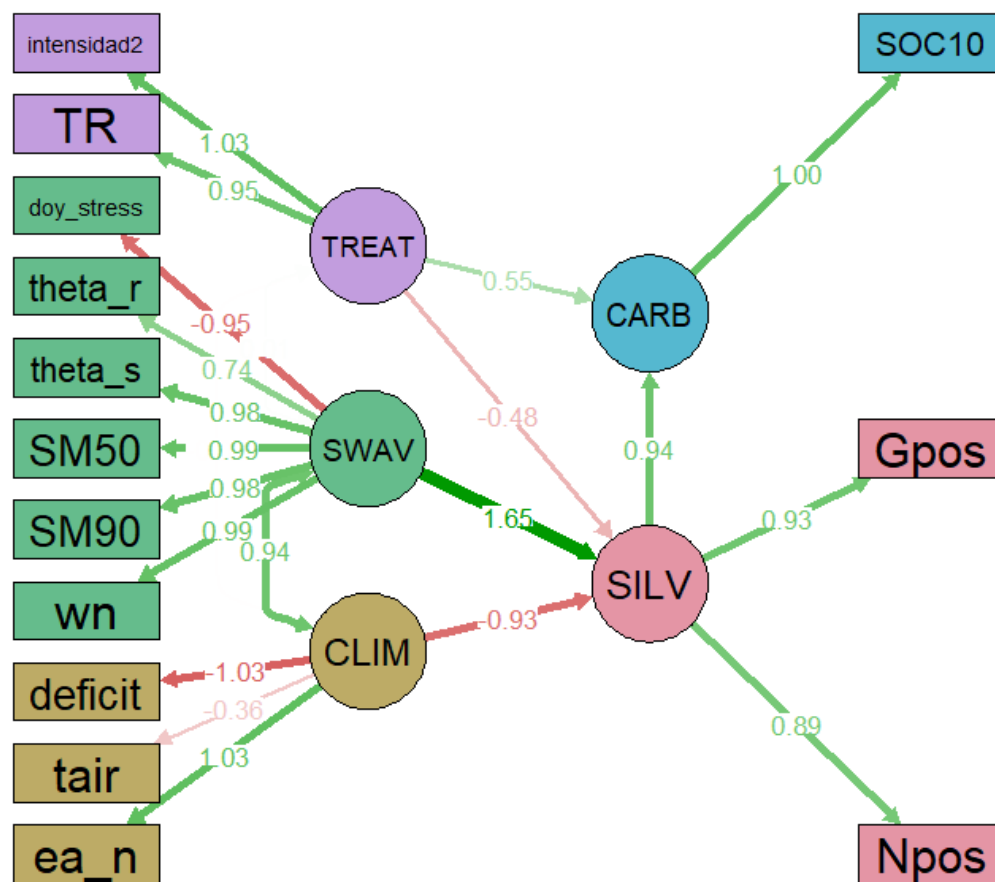

**Figure S2.** Structural Equation Model path describing effects of multiple predictors in carbon stock and dasometric variables after treatments. Only significant effects or covariances were showed. Nodes represent different categories of predictors and endogenous variables: CLIM = Climatic variables; SWAV = Soil water availability; TREAT = Treatment variables; SILV = Silvicultural status of forest after treatment; CARB = SOC10, and environmental variables (see Table S3). Red arrows mean negative effect. Green arrows mean positive effect.

**Table S1.** Site descriptions and characteristics of selected stands. Values are means  $\pm$  SD.

| Species                 | Study site     | Latitude N | Longitude W | Aspect | Slope (%) | Elevation (masl) | Type of forests | Time span | Management         | Thinning year |
|-------------------------|----------------|------------|-------------|--------|-----------|------------------|-----------------|-----------|--------------------|---------------|
| <i>Pinus halepensis</i> | La Hunde       | 39° 05'    | 1° 12'      | Flat   | 5-10      | 950              | Plantation      | 1960-2018 | shelterwood method | 2008          |
|                         | Los Cuadros    | 38° 05'    | 1° 07'      | N-S    | 5-10      | 140              | Plantation      | 1970-2015 | shelterwood method | 2004          |
|                         | Cortijo Conejo | 37° 23'    | 3° 04'      | E-W    | 5-10      | 1115             | Plantation      | 1994-2020 | thinning           | 2005          |
| <i>Pinus nigra</i>      | Monte Alto     | 42° 34'    | 1° 06'      | W      | 20        | 705              |                 |           |                    | 1994          |
|                         | Cuenca         | 40° 02'    | 1° 59'      | Flat   | 3-5       | 1250             | Natural forest  | 1836-2012 | shelterwood method | 2007          |
|                         | Filabres       | 36° 43'    | 4° 58'      | N      |           | 1450             | Plantation      | 1979–2018 | shelterwood method | 2009          |
| <i>Pinus sylvestris</i> | Aspurz         | 42° 43'    | 1° 09'      | N      | 7         | 625              | Natural forests | 1985-2013 |                    | 1999          |
|                         | Garde          | 42° 49'    | 0° 52'      | NE     | 40        | 1335             | Natural forests | 1985-2013 |                    | 1999          |
|                         | Filabres       | 36° 43'    | 4° 58'      | N      |           | 1600             | Plantation      | 1979–2018 | shelterwood method | 2009          |
|                         | Añón-Mocanyo   | 41° 45'    | 0° 45''     |        |           | 1178-1998        | Natural forests |           |                    |               |

**Table S2.** Selected biomass models from SUR fitting statistics for softwood species (Ruiz Peinado et al., 2011)

| <i>Pinus halepensis</i>                                                                   | Equations                                             |
|-------------------------------------------------------------------------------------------|-------------------------------------------------------|
| Stem                                                                                      | $W_s = 0.0139*d^2*h$                                  |
| Stem Thick branches<br>If $d \leq 27.5$ cm then $Z = 0$ ; If $d > 27.5$ cm then $Z = 1$   | $W_{b7} = [3.926*(d-27.5)]*Z$                         |
| Medium branches                                                                           | $W_{b27} = 4.257 + 0.00506*d^2*h - 0.0722*d*h$        |
| Thin branches + needles                                                                   | $W_{b2+n} = 6.197 + 0.00932*d^2*h - 0.0686*d*h$       |
| Roots                                                                                     | $W_r = 0.0785*d^2$                                    |
| <i>Pinus nigra</i>                                                                        | Equations                                             |
| Stem                                                                                      | $W_s = 0.0403*d^{1.838}*h^{0.945}$                    |
| Stem Thick branches<br>If $d \leq 32.5$ cm then $Z = 0$ ; If $d > 32.5$ cm then $Z = 1$ ; | $W_{b7} = [0.228*(d-32.5)^2]*Z$                       |
| Medium branches                                                                           | $W_{b27} = 0.0521*d^2$                                |
| Thin branches + needles                                                                   | $W_{b2+n} = 0.0720*d^2$                               |
| Roots                                                                                     | $W_r = 0.0189*d^{2.445}$                              |
| <i>Pinus sylvestris</i>                                                                   | Equations                                             |
| Stem                                                                                      | $W_s = 0.0154*d^2*h$                                  |
| Stem Thick branches<br>If $d \leq 37.5$ cm then $Z = 0$ ; If $d > 37.5$ cm then $Z = 1$   | $W_{b7} = [0.540*(d-37.5)^2 - 0.0119*(d-37.5)^2*h]*Z$ |
| Medium branches                                                                           | $W_{b27} = 0.0295*d^{2.742}*h - 0.899$                |
| Thin branches + needles                                                                   | $W_{b2+n} = 0.530*d^{2.199}*h - 1.153$                |
| Roots                                                                                     | $W_r = 0.130*d^2$                                     |

Ws: Biomass weight of the stem fraction (kg). Wb7: Biomass weight of the thick branch fraction (diameter larger than 7 cm) (kg). Wb2-7: Biomass weight of medium branch fraction (diameter between 2 and 7 cm) (kg). Wb2+n Biomass weight of thin branch fraction (diameter smaller than 2 cm) with needles (kg). Wr: Biomass weight of the belowground fraction (kg); d: dbh (cm). h: tree height (m).

**Table S3.** Environmental data used to predict the effect of thinning on soil C sequestration (SOC<sub>10</sub>).

|            |                                                                                     |                     |
|------------|-------------------------------------------------------------------------------------|---------------------|
| Ho         | mean annual extraterrestrial solar irradiation                                      | J m <sup>-2</sup>   |
| hn         | mean annual net radiation                                                           | J m <sup>-2</sup>   |
| qn         | mean annual photosynthetic photon flux density                                      | mol m <sup>-2</sup> |
| wn         | mean annual soil moisture                                                           | mm                  |
| ea n       | annual actual evapotranspiration                                                    | mm                  |
| ep n       | annual potential evapotranspiration                                                 | mm                  |
| SM         | mean annual soil volumetric water content                                           | % vol.              |
| SM90       | max. annual soil volumetric water content calculated as the 90 quantile of daily    | % vol.              |
| SM50       | wieghthed mean soil volumetric water content calculated as the 50 quantile of daily | % vol.              |
| SM10       | min. annual soil volumetric water content calculated as the 90 quantile of daily    | % vol.              |
| ks         | saturated hydraulic conductivity                                                    | cm d <sup>-1</sup>  |
| theta s    | saturated soil volumetric water content                                             | % vol.              |
| theta r    | saturated soil volumetric water content                                             | % vol.              |
| kh         | saturated hydraulic conductivity                                                    | cm d <sup>-1</sup>  |
| h          | pressure heads h calculated from water retention curve                              | cm                  |
| doy max    | day of the year with maximum soil moisture stress                                   | Day                 |
| doy min    | day of the year when moderate soil moisture stress starts                           | Day                 |
| doy stress | total number of days under soil moisture stress                                     | days                |
